# Supplementary material
Source: PubMed Central journal article supplement (PMC5617645)
Supplement: NIHMS843857-supplement.pdf [file NIHMS843857-supplement.pdf]

Supplemental data for:

# Longitudinal monitoring of skin accumulation of nanocarriers and biologicals with fiber optic near infrared fluorescence spectroscopy (FONIRS)

James I. Griffin<sup>1</sup>, Michael J. Benchimol<sup>2</sup> and Dmitri Simberg<sup>1</sup>

<sup>1</sup>*The Skaggs School of Pharmacy and Pharmaceutical Sciences, University of Colorado Anschutz Medical Campus, 12850 East Montview Blvd., Aurora, CO 80045, USA*

<sup>2</sup>*Sonrgy Inc., 10655 Sorrento Valley Rd., San Diego, CA 92121*

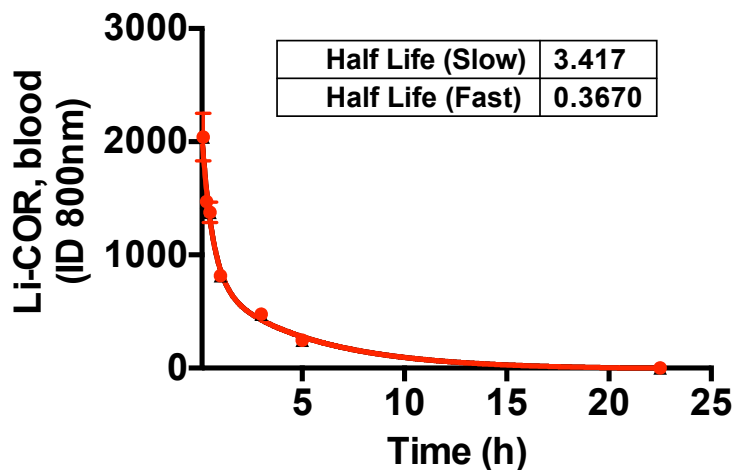

**Supplemental Fig. S1.** Elimination profile of IR Dye 800-dextran 500kDa. Box shows half-life (biexponential half-life, hours). N=2.

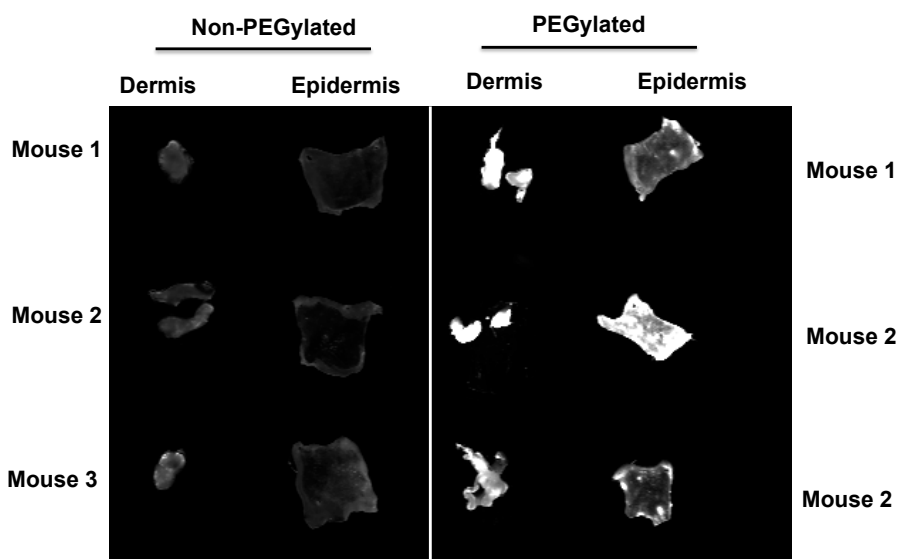

**Supplemental Fig. S2. Deposition of liposomes in the skin.** The skins from experiment in Fig. 5 were used. Epidermis was separated from dermis with a blade, and both parts were scanned with Li-COR (800nm channel). Most of fluorescence is in the dermis, although in some mice the epidermis also contained some liposomes (possibly due to incomplete separation of the dermal layer).

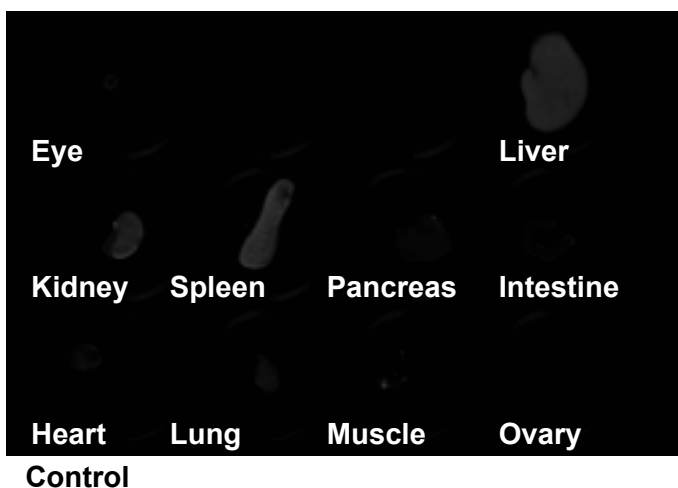

**Supplemental Fig. S3. Scan of organs from control (non-injected) mouse.**

Organs show some fluorescence in the 700 nm channel (autofluorescence) but no signal in the 800 nm channel.

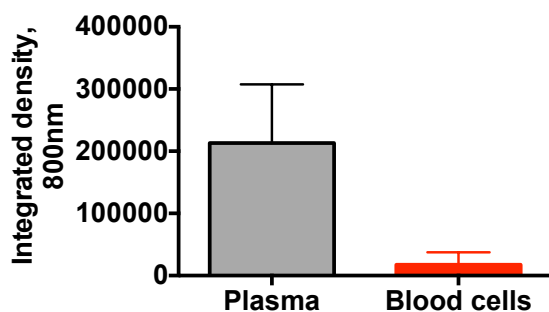

**Supplemental Fig. S4.** Blood from a mouse injected with DiR labeled PEGylated liposomes was separated into plasma and blood cells, applied on a membrane (2  $\mu$ l spot on a nitrocellulose membrane) and fluorescence was measured with Li-COR. Majority of fluorescence was associated with plasma fraction (5h post-injection).

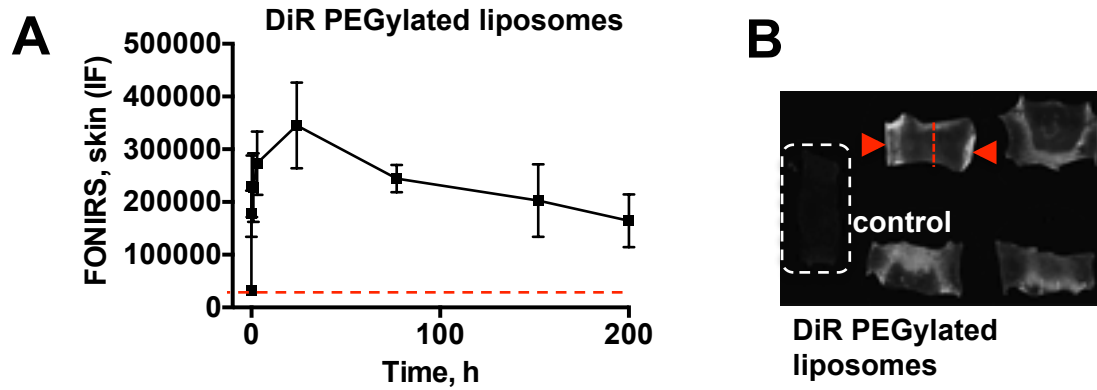

**Supplemental Fig. S5.** Nude mice were injected with PEGylated DiR labeled liposomes (similar to Fig. 5). **A)** FONIRS profile in the skin measured over time. Dotted line is a baseline (n=4); **B)** whole skin fluorescence (800nm channel–Li-COR). The fluorescence was more abundant on the flanks (red arrows) than along the spine (red dotted line).
